# Supplementary material for: Hsa_circ_0097271 Knockdown Attenuates Osteosarcoma Progression via Regulating miR-640/MCAM Pathway
Source: Hindawi journal article supplement (doi:10.1155/2022/8084034), 2022-10-26

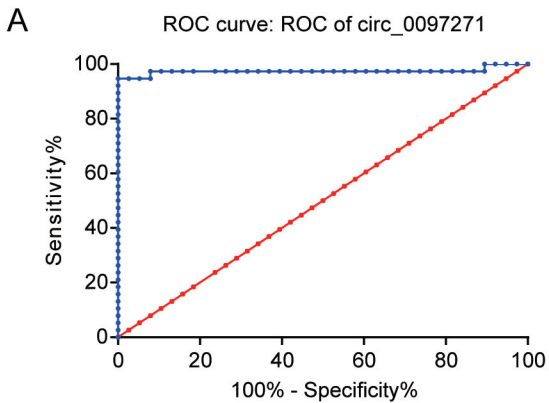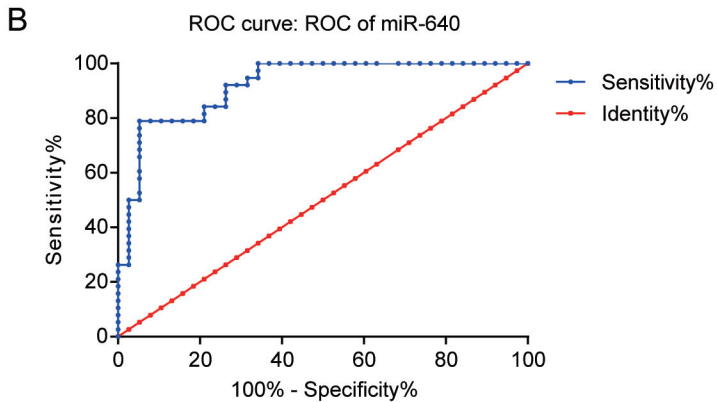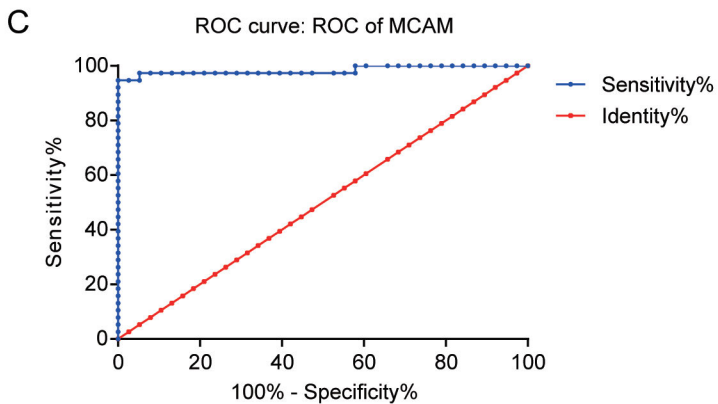

Supplement: f1 [file 8084034.f1.pdf]
